# Supplementary material for: Extracellular DNA and Type IV Pilus Expression Regulate the Structure and Kinetics of Biofilm Formation by Nontypeable Haemophilus influenzae
Source: PubMed Central journal article supplement (PMC5736908; doi:10.1128/mbio.01466-17), 2017-12-19

**A**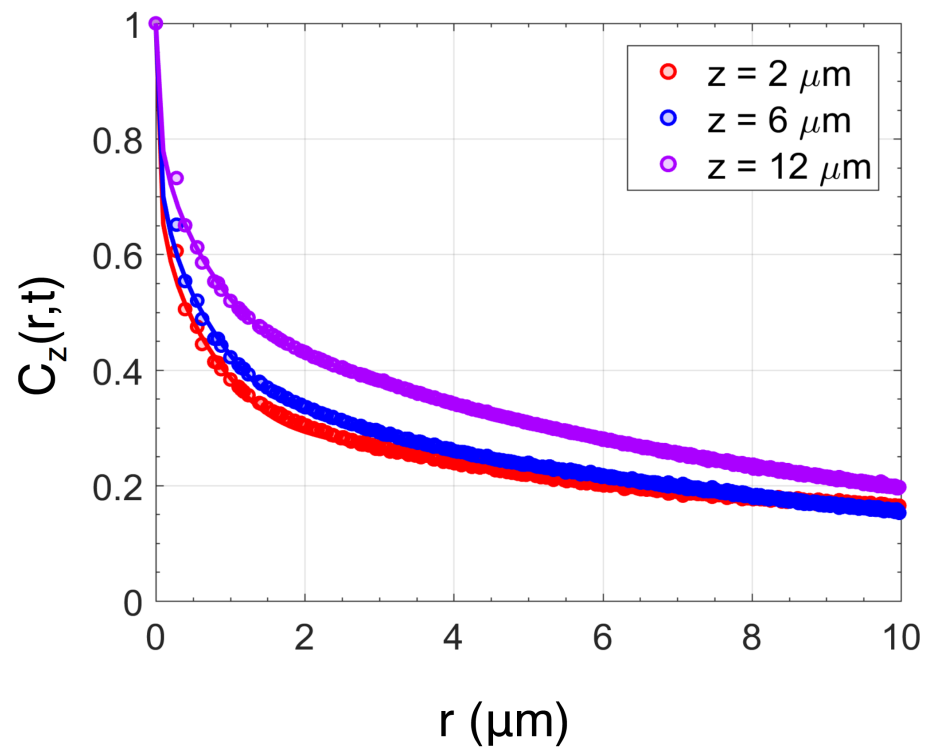**B**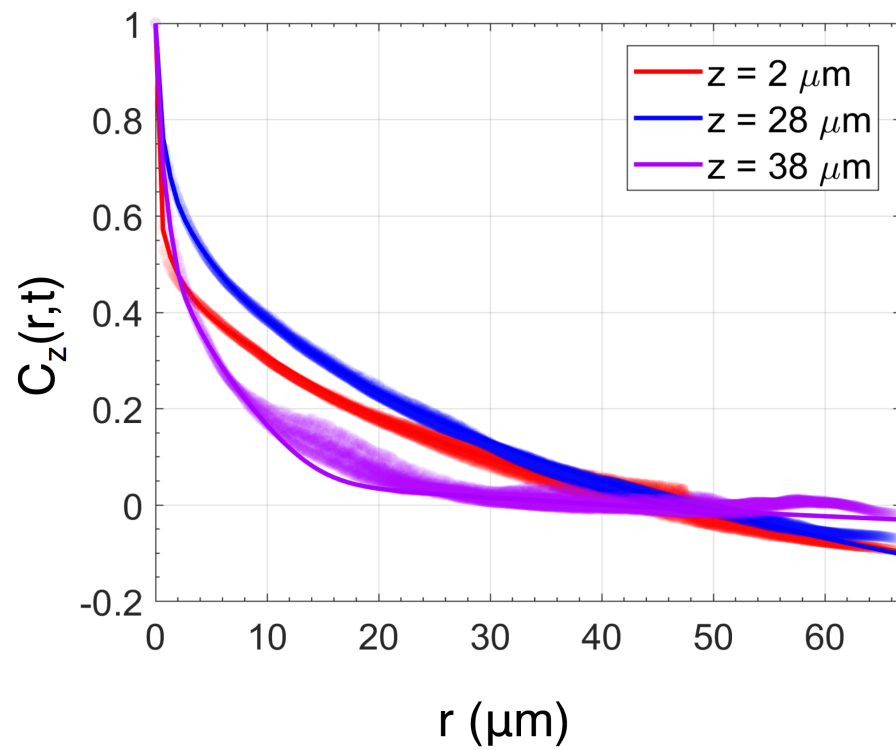

Supplement: mbo006173633sf1.pdf [file mbo006173633sf1.pdf]
